# Supplementary material for: MTGO-SC, A Tool to Explore Gene Modules in Single-Cell RNA Sequencing Data
Source: Front Genet. 2019 Oct 9;10:953. doi: 10.3389/fgene.2019.00953 (PMC6794379; doi:10.3389/fgene.2019.00953)
Supplement: Figure 3 — Rismed search on the Pubmed repository for peripherl blood terms. [file DataSheet_2.pdf]

|       |    |     |    |       |      |    |       |    |       |     |    |       |      |     |      |        |        |                                                |
|-------|----|-----|----|-------|------|----|-------|----|-------|-----|----|-------|------|-----|------|--------|--------|------------------------------------------------|
| 508   |    |     |    |       |      |    |       |    |       |     |    |       |      |     |      |        | 2641   | MHC class II antigen presentation              |
|       |    |     |    |       |      |    | 7035  | 3  | 2382  | 15  | 14 | 5058  | 1521 |     |      |        | 19714  | Signal Transduction                            |
| 39025 | 18 |     | 17 | 54415 | 5417 |    | 49813 | 43 | 18596 | 140 | 41 | 49686 | 5214 | 36  | 1072 | 133436 |        | Metabolism                                     |
|       |    |     |    |       |      |    | 136   |    |       |     |    |       | 70   | 34  |      |        | 246    | Post-translational protein phosphorylation     |
|       |    |     |    |       |      |    |       |    |       |     |    |       | 130  | 5   |      |        |        | Platelet degranulation                         |
| 2     |    |     |    |       |      |    | 12    |    |       |     |    |       | 12   |     |      |        |        | Cell surface interactions at the vascular wall |
|       |    |     |    |       |      |    | 1846  |    |       |     | 1  | 1526  | 59   |     |      |        |        | Adaptive Immune System                         |
| 23    |    |     |    | 196   | 2    |    | 124   | 2  | 18    | 1   | 2  | 1370  | 17   | 1   | 2    | 57     |        | Neutrophil degranulation                       |
|       |    | 803 |    |       |      |    |       |    |       |     |    |       |      |     |      |        | 121098 | Metabolism of proteins                         |
|       |    |     |    |       |      |    | 475   | 4  |       |     |    |       |      |     |      |        |        | Post-translational protein modification        |
|       |    |     |    |       |      |    |       |    |       |     |    | 2     | 3903 | 723 |      |        |        | Translation                                    |
|       |    |     |    | 54954 |      |    | 51    |    |       |     |    |       |      |     |      |        |        | Immune System                                  |
|       |    |     |    | 31    |      |    |       |    |       |     |    |       |      |     |      |        |        | Toll-like Receptor Cascades                    |
|       |    | 10  |    |       |      |    |       |    |       |     |    |       |      |     |      |        | 629    | Platelet activation                            |
|       |    |     |    | 792   |      |    | 1483  |    |       |     |    |       |      |     |      |        | 453    | Hemostasis                                     |
| 3501  | 1  | 55  | 1  | 7784  | 134  | 10 | 6287  | 4  | 4944  | 25  |    | 5217  |      | 5   | 165  | 29889  |        | Antimicrobial peptides                         |
| 65    |    |     |    |       |      |    |       |    |       |     |    |       |      |     |      |        | 96     | Cell Cycle, Mitotic                            |
|       |    |     |    | 22    |      |    | 3     |    | 1     |     |    |       |      |     |      |        | 4      | Metal sequestration by antimicrobial proteins  |
| 3423  |    |     |    | 1390  |      | 7  |       |    |       |     |    |       |      |     |      |        |        | Cell Cycle                                     |
| 8628  |    |     |    | 7314  |      | 11 |       |    |       |     |    |       |      |     |      |        |        | M Phase                                        |
| 105   |    |     |    | 56    |      |    |       |    |       |     |    |       |      |     |      |        |        | Cell Cycle Checkpoints                         |
| 90    |    |     |    |       |      |    |       |    |       |     |    |       |      |     |      |        |        | Signaling by Rho GTPases                       |
| 1304  |    |     |    |       |      |    |       |    |       |     |    | 1453  |      | 18  | 264  | 7276   |        | Signaling by Interleukins                      |
| 197   |    |     |    |       |      |    |       |    |       |     |    |       |      |     |      |        |        | S Phase                                        |
| 4     |    | 1   |    |       |      |    |       |    |       |     |    | 33    | 1    |     |      | 12     |        | Detoxification of Reactive Oxygen Species      |
|       |    | 27  |    |       |      |    |       |    |       |     |    |       |      |     |      |        |        | Metabolism of porphyrins                       |
|       |    | 46  |    |       |      |    |       |    |       |     |    |       |      |     |      |        |        | Heme biosynthesis                              |
|       |    | 167 |    |       |      |    |       |    |       |     |    |       |      |     |      |        |        | Metabolism of RNA                              |
|       |    | 39  |    |       |      |    |       |    |       |     |    |       |      |     |      |        |        | Metabolism of nucleotides                      |
|       |    | 142 |    |       |      |    |       |    |       |     |    | 2688  |      | 2   | 69   |        |        | Synthesis of DNA                               |
|       |    | 31  |    | 11234 |      | 6  |       |    |       |     |    |       |      |     |      |        |        | Metabolism of lipids                           |
|       |    |     | 1  | 6143  | 22   |    |       |    |       |     |    |       |      |     |      |        | 16414  | Cytokine Signaling in Immune system            |
|       |    |     |    | 3     |      |    |       |    |       |     |    |       |      |     |      |        | 20     | Mitotic Spindle Checkpoint                     |
|       |    |     |    | 48    |      |    |       |    |       |     |    |       |      |     |      |        |        | Oxidative Stress Induced Senescence            |
|       |    |     |    |       |      |    | 60    |    |       |     |    |       |      |     |      |        | 814    | PD-1 signaling                                 |
|       |    |     |    |       |      |    | 59    |    |       |     |    |       |      |     |      |        | 4634   | TCR signaling                                  |
|       |    |     |    |       |      |    |       |    | 309   | 1   |    |       |      |     |      |        |        | Peptide hormone metabolism                     |
|       |    |     |    |       |      |    |       |    |       |     |    | 12    | 2    |     |      |        |        | Translation initiation complex formation       |
|       |    |     |    |       |      |    |       |    |       |     |    | 5744  |      | 5   | 118  |        |        | Innate Immune System                           |
|       |    |     |    |       |      |    |       |    |       |     |    |       |      |     |      |        | 271    | Activation of Matrix Metalloproteinases        |
|       |    |     |    |       |      |    |       |    |       |     |    |       |      |     |      |        | 51     | DAP12 signaling                                |
|       |    |     |    |       |      |    |       |    |       |     |    |       |      |     |      |        | 568    | Membrane Trafficking                           |
