# Supplementary material for: MTGO-SC, A Tool to Explore Gene Modules in Single-Cell RNA Sequencing Data
Source: Front Genet. 2019 Oct 9;10:953. doi: 10.3389/fgene.2019.00953 (PMC6794379; doi:10.3389/fgene.2019.00953)
Supplement: Table 2 — Characteristics of the networks extracted from the cell communties. [file DataSheet_4.csv]

Aff..Score	pvalueAF	dimRete	logPvalueAF	tissue	cell_type	coexpression	thinning
0.000977886	1e-04	489	234.3263633	Peripheral_Blood	Bcell_Vpreb3high	kendall	scale_free_2.0
3.29E-05	1e-04	404	19.57665228	Peripheral_Blood	Monocyte_F13a1high	kendall	top_20
0.000609256	1e-04	3498	14.28486893	Peripheral_Blood	Neutrophil_Camphigh	rho_p	top_10
0.000121566	1e-04	777	73.94963834	Bladder	Smoothmusclecell	kendall	scale_free_3.0
0.000103571	1e-04	228	75.89474565	Bladder	Stromalcell_Car3high	rho_p	scale_free_2.0
4.61E-05	1e-04	128	47.84985029	Bladder	Stromalcell_Dpthigh	rho_p	scale_free_2.5
9.22E-05	1e-04	64	106.9367323	Bladder	Urothelium	spearman	scale_free_2.5
0.000110089	1e-04	858	23.20549218	Bladder	Vascularendothelialcell	spearman	scale_free_3.0
0.000365897	1e-04	2521	9.542267516	Peripheral_Blood	Erythroblast_Car2high	kendall	scale_free_3.0
0.000402514	1e-04	33	9.996216234	Bladder	Basalepithelialcell	pearson	scale_free_2.0
5.96E-05	1e-04	99	10.16179629	Peripheral_Blood	Bcell_Ly6dhigh	spearman	scale_free_3.0
0.000637445	0.005263115	10706	5.247032243	Peripheral_Blood	Tcell_Gm14303high	rho_p	scale_free_3.0
6.49E-05	0.000331077	91	8.013158655	Bladder	Mesenchymalstromalcell	rho_p	scale_free_2.0
0.000244532	0.00321677	1358	5.739377441	Peripheral_Blood	Monocyte_Elanehigh	rho_p	top_20
0.001644426	0.003244179	324	5.730892817	Peripheral_Blood	Macrophage_Acehigh	rho_p	top_10
0.000620758	0.006737185	466	5.000113129	Peripheral_Blood	Tcell_Trbc2high	pearson	top_10
0.000176225	0.009561868	536	4.64997214	Peripheral_Blood	Neutrophil_Il1bhigh	rho_p	top_10
0.00046375	0.054182966	1273	2.915388695	Bladder	Umbrellacell	rho_p	top_10
0.000193755	0.080318562	617	2.521754527	Peripheral_Blood	NKcell_Gzmahigh	rho_p	top_20
0.000264584	0.091352933	357	2.393024893	Peripheral_Blood	Macrophage_S100a4high	rho_p	top_10
0.000280725	0.269269266	3554	1.312043411	Bladder	Epithelialcell_Upk3ahigh	rho_p	top_20
